# Supplementary material for: Miocene Cupressinoxylon from Gökçeada (Imbros), Turkey with Protophytobia cambium mining and the study of ecological signals of wood anatomy
Source: PeerJ. 2022 Dec 12;10:e14212. doi: 10.7717/peerj.14212 (PMC9753763; doi:10.7717/peerj.14212)
Supplement: Supplemental Information 1 — The symbols indicate the presence (+), the absence (−) or the lack of information (?) of the anatomical characters. The features in red color can be found both in normal as well as in wood facing biotic or abiotic stress and should be used with caution especially when applied for taxonomic purposes [file peerj-10-14212-s001.xlsx]

## Sheet: Tabelle1
			FOSSIL SPECIES										EXTANT SPECIES
Features	IAWA Committee (2004) codes	Esteban et al. (2004) codes	Cupressinoxylon secretiferum Greguss	Cupressinoxylon kostyniukii Dolezych	Cupressinoxylon xanthocyperioides Dolezych	Cupressinoxylon eschweilerense van der Burgh	Cupressinoxylon eocenicum Dupéron-Laudoueneix	Cupressinoxylon diskoense Walton	Cupressinoxylon sabinianum Schenk	Cupressinoxylon luckense (Kostyniuk) Kräusel	Cupressinoxylon matromnense Grambast Paris	Cupressinoxylon matromnense Grambast Gökçeada	Hesperocyparis macrocarpa (Hartw.) Bartel	Xanthocyparis vietnamensis Farjon & T.H.Nguyên	Callitropsis nootkatensis (D. Don) Florin ex D.P. Little
Well-defined growth rings	40	(AT1)	+	+	+	+	+	+	+	+	+	+	+	+	+
Gradual transition	43		+	-	?	+	-	-	? (-)	?	?	+	+	-	+
Axial tracheids of circular section		(AT3)	variable	polygonal	round to polygonal	+	variable	?	variable	pentagonal and roundish	variable	+	?	?	?
Uniseriate bordered pits on the radial walls of the axial tracheids	44	(AT10)	?	+ (& partly biseriate with crassulae)	+	+ (& partly biseriate)	+ (& partly biseriate with crassulae)	+ (& partly biseriate, opposite)	+	+	+ (and partly biseriate with crassulae)	+	+	+	+
Intercellular spaces present	53	(AT6)	?	?	?	?	?	?	+	?	+	+	-	-	-
Warty layer	60		?	?	?	?	?	?	?	?	?	?	+	+/-	+/-
Diffuse axial parenchyma present	73	(P6)	+	+	+	+	+	+	+	+	+	+	+	+	-
Tangential zonate or terminal axial parenchyma present	74, 75	(P7, P8)	+	+	+	+	+	-	?	+	+	+	+	-	-
Axial parenchyma with smooth transverse walls	76	(P2)	?	-	+ (occasionally)	-	-	+	+	+	+	+	+	*	-
Axial parenchyma with irregularly thickened transverse end walls	77		?	+	-	-	variable	-	?	+ (slightly)	-	?	+/-	*	-
Axial parenchyma with nodular transverse walls	78	(P3)	+ (slightly)	+	+	+	+	-	+	+	+ (slightly)	+	+	*	-
Ray tracheids present	79		?	-	-	-	-	-	-	-	-	?	+	-	+
Homogenous rays	80		?	+		+	+	+	+	-	+	+	+	+	+
Ray parenchyma with smooth axial (end) walls	85	(R16)	+	+	+	+	+	+	+	+	+	+	+	+	+
Ray parenchyma with nodular end walls	86	(R17)	-	+	-	occasionally	+	-	-	-	-	?	+/-	-	+/-
Ray parenchyma with smooth horizontal walls	87	(R18)	+	+	-	-	-	+	+	+	+	+	+	+	+
Ray parenchyma with pitted horizontal walls	88	(R19)	+ (?)	+ (occasionally)	+	+	+	-	+ (occasionally)	sparsely	-	-	-	-	+/-
Indentures	89	(R37)	+	+	-	-	+	?	?	?	+	+	+	-	+
Cupressoid cross field pits	93	(R24)	?	+	+	+	+ (tending to taxodioid sometimes)	+	+	+	+ (+ taxodioid up to podocarpoid)	+	+	+	+
1-2 pits per cross-field	97	(R26)	?	+	+	?	98%	+	+	+	+	+	+	-	+
1-3 pits per cross-field	98		?	2-3	+	?	1%	+	+	+	+ (mostly)	+	-	-	-
3-5 pits per cross-field	99		?	- 6	-4	?	1% (4)	-4	-4	-4	-5	-4	-	+	-
Ray height from 1 to 15 cells	103	(R4)	1-20	1-9	-10	-10	1-11	1-16	1-5	1-12	1-13	+	+	1-10	1-15
Uniseriate rays	107	(R1)	?	+	+	+	+	+	+	+	+	+	+	+	+
Partially biseriate rays	108	(R2)	?	+	-	-	-	+	-	-	+	+	-	-	+/-
AGE			Middle Miocene, Helvetian (Hungary)	Middle Miocene (Welzow, Brandenburg, Germany)	Middle Miocene (Welzow, Brandenburg, Germany)	Pliocene (Lower Rhine Basin, Netherlands)	Eocene (Charente, France)	?Cretaceous (Disko Island, West Greenland)	Miocene (Haseninsel, Greenland)	middle-upper Oligocene/ early Miocene (Niebożka, Łuck, Ukraine)	upper Oligocene (Paris, France)	middle Miocene (Gökçeada, Turkey)
