# Supplementary material for: Miocene Cupressinoxylon from Gökçeada (Imbros), Turkey with Protophytobia cambium mining and the study of ecological signals of wood anatomy
Source: PeerJ. 2022 Dec 12;10:e14212. doi: 10.7717/peerj.14212 (PMC9753763; doi:10.7717/peerj.14212)
Supplement: Supplemental Information 2 — The available measurements of the pith flecks and the hypertrophic cells from fossil and extant wood with Palaeo/Protophytobia and Phytobia infections are included in this table with the addition of the measurements on our fossil Cupressinoxylon with Protophytobia from Turkey. The symbol (?) indicates the lack of information. [file peerj-10-14212-s002.xlsx]

## Sheet: Tabelle1
	Fossil species (Palaeophytobia Süss & Müller-Stoll- Protophytobia Süss)				Extant Hosts of Phytobia Lioy
Size of the Pith Flecks and the Hypertrophic Cells	Palaeophytobia prunorum Süss & Müller-Stoll (Süss & Müller-Stoll 1980)	Palaeophytobia salicaria Süss (Geissert et al. 1981)	Protophytobia cupressorum Süss (Süss 1979)	Protophytobia sp. (Gökçeada)	Callitris drummondii Benth. et Hook (Süss 1979)	Rosaceae (Rioux 1994)
PF Radial width in μm	-400	700	90-260	100-1000	75-200
PF Tangential width in μm	-800	160	500-2000	500-3300	250-2200	100-700
HC Radial diameter in μm	?	?	?	41.8 (17.1-69.0) (60 measurements)	?	-40
HC Tangential diameter in μm	?	?	?	34.9 (20.7-62.8) (60 measurements)	?	-40
